# Supplementary material for: Response of rhizosphere soil microbial to Deyeuxia angustifolia encroaching in two different vegetation communities in alpine tundra
Source: PubMed Central journal article supplement (PMC5318906; doi:10.1038/srep43150), 2017-02-21
Supplement: srep43150-s1.pdf [file srep43150-s1.pdf]

# Response of rhizosphere soil microbial to *Deyeuxia angustifolia* encroaching in two different vegetation communities in alpine tundra

Li Lin<sup>1,3</sup>, Xing Ming<sup>1,3</sup>, Lv Jianwei<sup>2</sup>, Wang Xiaolong<sup>1,3</sup>, Chen Xia<sup>1,3\*</sup>

<sup>1</sup>National & Local United Engineering Laboratory for Chinese Herbal Medicine Breeding and Cultivation, Jilin University, Changchun 130112, China.

<sup>2</sup>Huhhot Vocational college, Huhht, Inner Mongolia 010051, China.

<sup>3</sup>School of Life Science, Jilin University, Changchun 130012, China.

\*For correspondence. E-mail address: chenxiajlu@163.com

TableS1. Sampling sites, geographical location and dominant species that use plant coverage (%) to indicate.

| Types | Altitude(m) | Latitude     | Longitude    | Dominant species & Coverage (%)                                                                                                                                                       |
|-------|-------------|--------------|--------------|---------------------------------------------------------------------------------------------------------------------------------------------------------------------------------------|
| NH    | 2182        | 41°59'25.57" | 128°1'0.23"  | <i>Ligularia jamesii</i> (Hemsl.) Kom. 43%, <i>Sanguisorba sitchensis</i> 46%, <i>Veratrum nigrum</i> L. 7%                                                                           |
| EH    | 2182        | 41°59'25.57" | 128°1'0.23"  | <i>D. angustifolia</i> 40%, <i>Ligularia jamesii</i> (Hemsl.) Kom. 22%, <i>Sanguisorba sitchensis</i> 26%                                                                             |
| NS    | 2182        | 41°59'25.57" | 128°1'0.23"  | <i>Rhododendron aureum</i> Georgi 60%, <i>Vaccinium uliginosum</i> Linn. 28%                                                                                                          |
| ES    | 2182        | 41°59'25.57" | 128°1'0.23"  | <i>D. angustifolia</i> 35%, <i>Rhododendron aureum</i> Georgi 35%, <i>Vaccinium uliginosum</i> Linn. 25%                                                                              |
| DA    | 2182        | 41°59'25.57" | 128°1'0.23"  | <i>D. angustifolia</i> 92%                                                                                                                                                            |
| NS    | 2178        | 41°59'20.99" | 128°0'52.65" | <i>Vaccinium uliginosum</i> Linn. 68%, <i>Phyllodoce caerulea</i> (L.) Bab. 24%                                                                                                       |
| ES    | 2178        | 41°59'20.99" | 128°0'52.65" | <i>D. angustifolia</i> 49%, <i>Vaccinium uliginosum</i> Linn. 28%, <i>Phyllodoce caerulea</i> (L.) Bab. 15%                                                                           |
| NS    | 2178        | 41°59'20.99" | 128°0'52.65" | <i>Rhododendron aureum</i> Georgi 83%, <i>Vaccinium uliginosum</i> Linn. 8%                                                                                                           |
| ES    | 2178        | 41°59'20.99" | 128°0'52.65" | <i>D. angustifolia</i> 49%, <i>Rhododendron aureum</i> Georgi 42%                                                                                                                     |
| DA    | 2178        | 41°59'20.99" | 128°0'52.65" | <i>D. angustifolia</i> 90%                                                                                                                                                            |
| NS    | 2143        | 41°59'25.02" | 128°0'45.68" | <i>Rhododendron aureum</i> Georgi 95%, <i>Vaccinium uliginosum</i> Linn. 3%                                                                                                           |
| ES    | 2143        | 41°59'25.02" | 128°0'45.68" | <i>D. angustifolia</i> 45%, <i>Rhododendron aureum</i> Georgi 51%                                                                                                                     |
| NS    | 2143        | 41°59'25.02" | 128°0'45.68" | <i>Vaccinium uliginosum</i> Linn. 92%                                                                                                                                                 |
| ES    | 2143        | 41°59'25.02" | 128°0'45.68" | <i>D. angustifolia</i> 55%, <i>Vaccinium uliginosum</i> Linn. 36%                                                                                                                     |
| NH    | 2142        | 41°59'25.02" | 128°0'45.68" | <i>Ligularia jamesii</i> (Hemsl.) Kom. 82%, <i>Trollius chinensis</i> Bunge 7%, <i>Veratrum nigrum</i> L. 5%                                                                          |
| EH    | 2143        | 41°59'25.02" | 128°0'45.68" | <i>D. angustifolia</i> 45%, <i>Ligularia jamesii</i> (Hemsl.) Kom. 42%, <i>Trollius chinensis</i> Bunge 6%                                                                            |
| DA    | 2143        | 41°59'25.02" | 128°0'45.68" | <i>D. angustifolia</i> 93%                                                                                                                                                            |
| NS    | 2034        | 41°59'20.92" | 128°0'9"     | <i>Phyllodoce caerulea</i> (L.) Bab. 34%, <i>Rhododendron aureum</i> Georgi 52%, <i>Vaccinium uliginosum</i> Linn. 9%                                                                 |
| ES    | 2034        | 41°59'20.92" | 128°0'9"     | <i>D. angustifolia</i> 47%, <i>Phyllodoce caerulea</i> (L.) Bab. 15%, <i>Rhododendron aureum</i> Georgi 23%, <i>Vaccinium uliginosum</i> Linn. 7%                                     |
| NH    | 2034        | 41°59'20.92" | 128°0'9"     | <i>Sanguisorba sitchensis</i> 60%, <i>Trollius chinensis</i> Bunge 22%, <i>Aconitum monanthum</i> Nakai 8%, <i>Veratrum nigrum</i> L. 5%                                              |
| EH    | 2034        | 41°59'20.92" | 128°0'9"     | <i>D. angustifolia</i> 55%, <i>Sanguisorba sitchensis</i> 30%, <i>Trollius chinensis</i> Bunge 8%, <i>Aconitum monanthum</i> Nakai 5%                                                 |
| NH    | 2034        | 41°59'20.92" | 128°0'9"     | <i>Sanguisorba sitchensis</i> 30%, <i>Aconitum monanthum</i> Nakai 21%, <i>Veratrum nigrum</i> L. 15%, <i>Trollius chinensis</i> Bunge 18%, <i>Ligularia jamesii</i> (Hemsl.) Kom 10% |
| EH    | 2034        | 41°59'20.92" | 128°0'9"     | <i>D. angustifolia</i> 42%, <i>Sanguisorba sitchensis</i> 18%, <i>Aconitum monanthum</i> Nakai 12%, <i>Trollius chinensis</i> Bunge 8%, <i>Veratrum nigrum</i> L. 5%                  |
| DA    | 2034        | 41°59'20.92" | 128°0'9"     | <i>D. angustifolia</i> 90%, <i>Veratrum nigrum</i> L. 5%                                                                                                                              |
| NH    | 2026        | 41°59'15.72" | 128°0'6.29"  | <i>Trollius chinensis</i> Bunge 35%, <i>Sanguisorba sitchensis</i> 30%, <i>Aconitum monanthum</i> Nakai 12%, <i>Veratrum nigrum</i> L. 8%, <i>Ligularia jamesii</i> (Hemsl.) Kom 12%  |
| EH    | 2026        | 41°59'15.72" | 128°0'6.29"  | <i>Trollius chinensis</i> Bunge 25%, <i>Sanguisorba sitchensis</i> 9%, <i>Aconitum monanthum</i> Nakai 7%, <i>Veratrum nigrum</i> L. 4%                                               |
| DA    | 2026        | 41°59'15.72" | 128°0'6.29"  | <i>D. angustifolia</i> 83%, <i>Trollius chinensis</i> Bunge 6%                                                                                                                        |

TableS2. Primers and real-time PCR conditions used in this experiment.

| function genes | primers                                     | real-time PCR protocol                                                                                                  |
|----------------|---------------------------------------------|-------------------------------------------------------------------------------------------------------------------------|
| <i>nifH</i>    | PolF 5'-TG CGAY CCS AAR GCB GAC TC-3'       | 94 °C for 5 min; 40 cycles of 94 °C for 30s, 57 °C for 45s(54 °C for <i>nifH</i> gene, 60 °C for AOB), 72 °C for 1 min. |
|                | PolR 5'-ATS GCC ATC ATY TCR CCG GA-3'       |                                                                                                                         |
| AOA            | Arch-amoAF 5'-STA ATG GTC TGG CTT AGA CG-3' |                                                                                                                         |
|                | Arch-amoAR 5'-GCG GCC ATC CAT CTG TAT GT-3' |                                                                                                                         |
| AOB            | amoA-1F 5'-GGG GTT TCT ACT GGT GGT-3'       |                                                                                                                         |
|                | amoA-2R 5'-CCC CTC KGS AAA GCC TTC TTC-3'   |                                                                                                                         |
| <i>nosZ</i>    | nosZ-F 5'-CGY TGT TCM TCG ACA GCC AG-3'     |                                                                                                                         |
|                | nosZ 1622R 5'-CGS ACC TTS TTG CCS TYG CG-3' |                                                                                                                         |

TableS3. Pearson correlation coefficient (*r*) between soil properties and enzymatic activities, Asterisk indicates significant differences \*indicate significant ( $P<0.05$ ) effects, \*\* indicate significant ( $P<0.01$ ) effects.

|          | TN      | TOC     | TP      | TK     | NO <sub>3</sub> <sup>-</sup> | NH <sub>4</sub> <sup>+</sup> | Moisture | pH     | MBC   | MBN    | AN      | AP      | AK      | C/N     |
|----------|---------|---------|---------|--------|------------------------------|------------------------------|----------|--------|-------|--------|---------|---------|---------|---------|
| Urease   | 0.616** | 0.715** | 0.329*  | -0.288 | -0.153                       | 0.082                        | 0.567**  | -0.336 | 0.016 | -0.076 | 0.515** | 0.290   | 0.422*  | 0.606** |
| Sucrase  | 0.484** | 0.714** | 0.177   | -0.260 | -0.278                       | 0.275                        | 0.402*   | -0.168 | 0.094 | -0.318 | 0.317   | 0.084   | 0.324*  | 0.683** |
| ACP      | 0.062   | 0.242   | 0.490** | -0.086 | -0.030                       | 0.240                        | 0.310    | -0.409 | 0.037 | -0.087 | 0.297   | 0.651** | 0.543** | 0.233   |
| Catalase | 0.748** | 0.731** | 0.387*  | 0.034  | 0.013                        | 0.305                        | 0.592**  | -0.244 | 0.262 | -0.100 | 0.440*  | 0.336*  | 0.413*  | 0.561** |

TableS4. Pearson correlation coefficient ( $r$ ) between N cycling function genes abundance and soil properties, just list significant ( $P < 0.05$ ) correlation. Bolded values indicate significant ( $P < 0.05$ ) effects.

|                              | AOB           |              | AOA           |              | <i>nosZ</i>   |              | <i>nifH</i>   |              |
|------------------------------|---------------|--------------|---------------|--------------|---------------|--------------|---------------|--------------|
|                              | $r$           | $P$          | $r$           | $P$          | $r$           | $P$          | $r$           | $P$          |
| <b>Total</b>                 | <b>n=27</b>   |              |               |              |               |              |               |              |
| NO <sub>3</sub> <sup>-</sup> | <b>-0.404</b> | <b>0.036</b> | <b>0.451</b>  | <b>0.018</b> | -0.073        | 0.719        | -0.050        | 0.806        |
| AP                           | <b>-0.410</b> | <b>0.040</b> | -0.061        | 0.764        | 0.291         | 0.141        | -0.324        | 0.099        |
| TP                           | -0.245        | 0.218        | 0.298         | 0.131        | 0.039         | 0.847        | <b>0.461</b>  | <b>0.016</b> |
| NH <sub>4</sub> <sup>+</sup> | -0.118        | 0.557        | -0.132        | 0.512        | <b>0.560</b>  | <b>0.002</b> | -0.207        | 0.300        |
| Moisture                     | 0.020         | 0.922        | -0.096        | 0.634        | <b>0.490</b>  | <b>0.009</b> | 0.013         | 0.950        |
| <b>Herbaceous</b>            | <b>n=10</b>   |              |               |              |               |              |               |              |
| AP                           | <b>-0.636</b> | <b>0.048</b> | -0.240        | 0.505        | -0.341        | 0.334        | -0.463        | 0.178        |
| TOC                          | 0.249         | 0.489        | <b>0.833</b>  | <b>0.003</b> | 0.207         | 0.506        | <b>0.815</b>  | <b>0.004</b> |
| TP                           | -0.232        | 0.518        | <b>0.672</b>  | <b>0.033</b> | -0.023        | 0.950        | <b>0.668</b>  | <b>0.035</b> |
| C/N                          | 0.293         | 0.412        | <b>0.701</b>  | <b>0.024</b> | 0.190         | 0.599        | <b>0.698</b>  | <b>0.025</b> |
| TK                           | -0.514        | 0.128        | <b>-0.671</b> | <b>0.034</b> | 0.193         | 0.592        | <b>-0.632</b> | <b>0.048</b> |
| MBC                          | -0.425        | 0.221        | -0.213        | 0.554        | <b>-0.633</b> | <b>0.049</b> | -0.469        | 0.171        |
| MBN                          | -0.452        | 0.190        | -0.357        | 0.311        | <b>-0.665</b> | <b>0.036</b> | -0.542        | 0.106        |
| Moisture                     | 0.475         | 0.165        | <b>0.626</b>  | <b>0.530</b> | 0.456         | 0.185        | <b>0.633</b>  | <b>0.037</b> |
| <b>Shrub</b>                 | <b>n=12</b>   |              |               |              |               |              |               |              |
| AN                           | 0.420         | 0.174        | <b>-0.591</b> | <b>0.043</b> | -0.029        | 0.928        | 0.533         | 0.074        |
| AK                           | -0.173        | 0.582        | <b>-0.643</b> | <b>0.024</b> | <b>0.334</b>  | <b>0.288</b> | 0.431         | 0.161        |
| NH <sub>4</sub> <sup>+</sup> | -0.231        | 0.471        | -0.437        | 0.155        | <b>0.620</b>  | <b>0.031</b> | -0.332        | 0.291        |
| MBC                          | -0.240        | 0.460        | -0.143        | 0.658        | <b>0.841</b>  | <b>0.001</b> | 0.134         | 0.679        |

TableS5. Alpha Diversity Metrics for Native sites (NH, NS), Encroaching sites (EH, ES) in two vegetation types and *D. angustifolia* (DA) bacteria.

|    | chao1   | observed species | PD whole tree | shannon | simpson | goods coverage |
|----|---------|------------------|---------------|---------|---------|----------------|
| NS | 1100.42 | 857.5            | 54.29         | 7.86    | 0.99    | 0.99           |
| ES | 925.80  | 826.83           | 48.02         | 7.40    | 0.98    | 0.99           |
| NH | 1037.12 | 865.40           | 52.10         | 7.45    | 0.98    | 0.99           |
| EH | 998.05  | 834.80           | 51.02         | 7.36    | 0.98    | 0.99           |
| DA | 863.95  | 747.75           | 48.38         | 7.62    | 0.98    | 0.99           |

TableS6. A non-parametric test showed differences between encroaching and native sites in two treatments (NS/ES and NH/EH), compare the microbial diversity *D. angustifolia* to native samples (DA/NS/NH) and to encroaching samples (DA/ES/EH). Bolded values indicate significant ( $\alpha < 0.05$ ) effects.

| Alpha name       | NS/ES        | NH/EH | DA/NS/NH    | DA/ES/EH |
|------------------|--------------|-------|-------------|----------|
| chao1            | <b>0.004</b> | 0.55  | <b>0.05</b> | 0.09     |
| observed species | 0.618        | 0.31  | 0.26        | 0.17     |
| PD whole tree    | <b>0.025</b> | 0.84  | 0.48        | 0.36     |
| shannon          | <b>0.037</b> | 0.84  | 0.70        | 0.82     |
| simpson          | 0.113        | 1.00  | 0.33        | 0.76     |
| goods coverage   | 0.857        | 0.84  | <b>0.03</b> | 0.22     |

TableS7. Phylum with a greater relative abundance associated with native and encroaching sites under woody and herbaceous treatment to have a significant effect based on ANOSIM Analysis. Bolded values indicate significant ( $P < 0.05$ ) effects.

| Phylum                      | NS/ES       | NH/EH       | DA/NS/NH    | DA/ES/EH |
|-----------------------------|-------------|-------------|-------------|----------|
| Acidobacteria               | 0.07        | 0.43        | 0.17        | 0.17     |
| Proteobacteria              | <b>0.05</b> | <b>0.05</b> | 0.12        | 0.66     |
| Actinobacteria              | 0.11        | 0.43        | 0.43        | 0.15     |
| Bacteroidetes               | 0.09        | 0.25        | <b>0.04</b> | 0.58     |
| Chloroflexi                 | 0.61        | 0.66        | 0.41        | 0.71     |
| Candidatus Saccharibacteria | 0.69        | 0.93        | 0.08        | 0.20     |
| Planctomycetes              | <b>0.04</b> | 1.00        | 0.42        | 0.31     |
| Firmicutes                  | 0.61        | 0.93        | 0.35        | 0.45     |
| Gemmatimonadetes            | <b>0.02</b> | 0.79        | <b>0.04</b> | 0.64     |
| Verrucomicrobia             | 0.08        | 0.54        | 0.51        | 0.61     |
| Nitrospirae                 | 0.50        | 1.00        | <b>0.04</b> | 0.63     |
| Latescibacteria             | 1.00        | 0.40        | <b>0.05</b> | 0.68     |
| Cyanobacteria/Chloroplast   | 0.17        | 0.27        | 0.31        | 0.47     |
| Chlamydiae                  | 0.26        | 0.51        | 0.61        | 0.70     |

TableS8. The correlation between community composition and environmental variables for bacteria. Values in bold indicate significant correlation ( $P < 0.05$ ).

| <b>Variable</b>              | <b><i>r</i></b> | <b><i>Pr</i> (&gt;<i>r</i>)</b> |
|------------------------------|-----------------|---------------------------------|
| <b>TN</b>                    | <b>0.353</b>    | <b>0.009 **</b>                 |
| <b>Moisture</b>              | <b>0.262</b>    | <b>0.030 *</b>                  |
| <b>pH</b>                    | <b>0.261</b>    | <b>0.024 *</b>                  |
| <b>MBN</b>                   | <b>0.274</b>    | <b>0.029 *</b>                  |
| MBN                          | 0.204           | 0.068                           |
| AK                           | 0.174           | 0.096                           |
| Elevation                    | 0.153           | 0.128                           |
| TOC                          | 0.157           | 0.129                           |
| NH <sub>4</sub> <sup>+</sup> | 0.100           | 0.266                           |
| AP                           | 0.055           | 0.520                           |
| AN                           | 0.034           | 0.663                           |
| TK                           | 0.026           | 0.722                           |
| NO <sub>3</sub> <sup>-</sup> | 0.022           | 0.745                           |
| TP                           | 0.020           | 0.794                           |

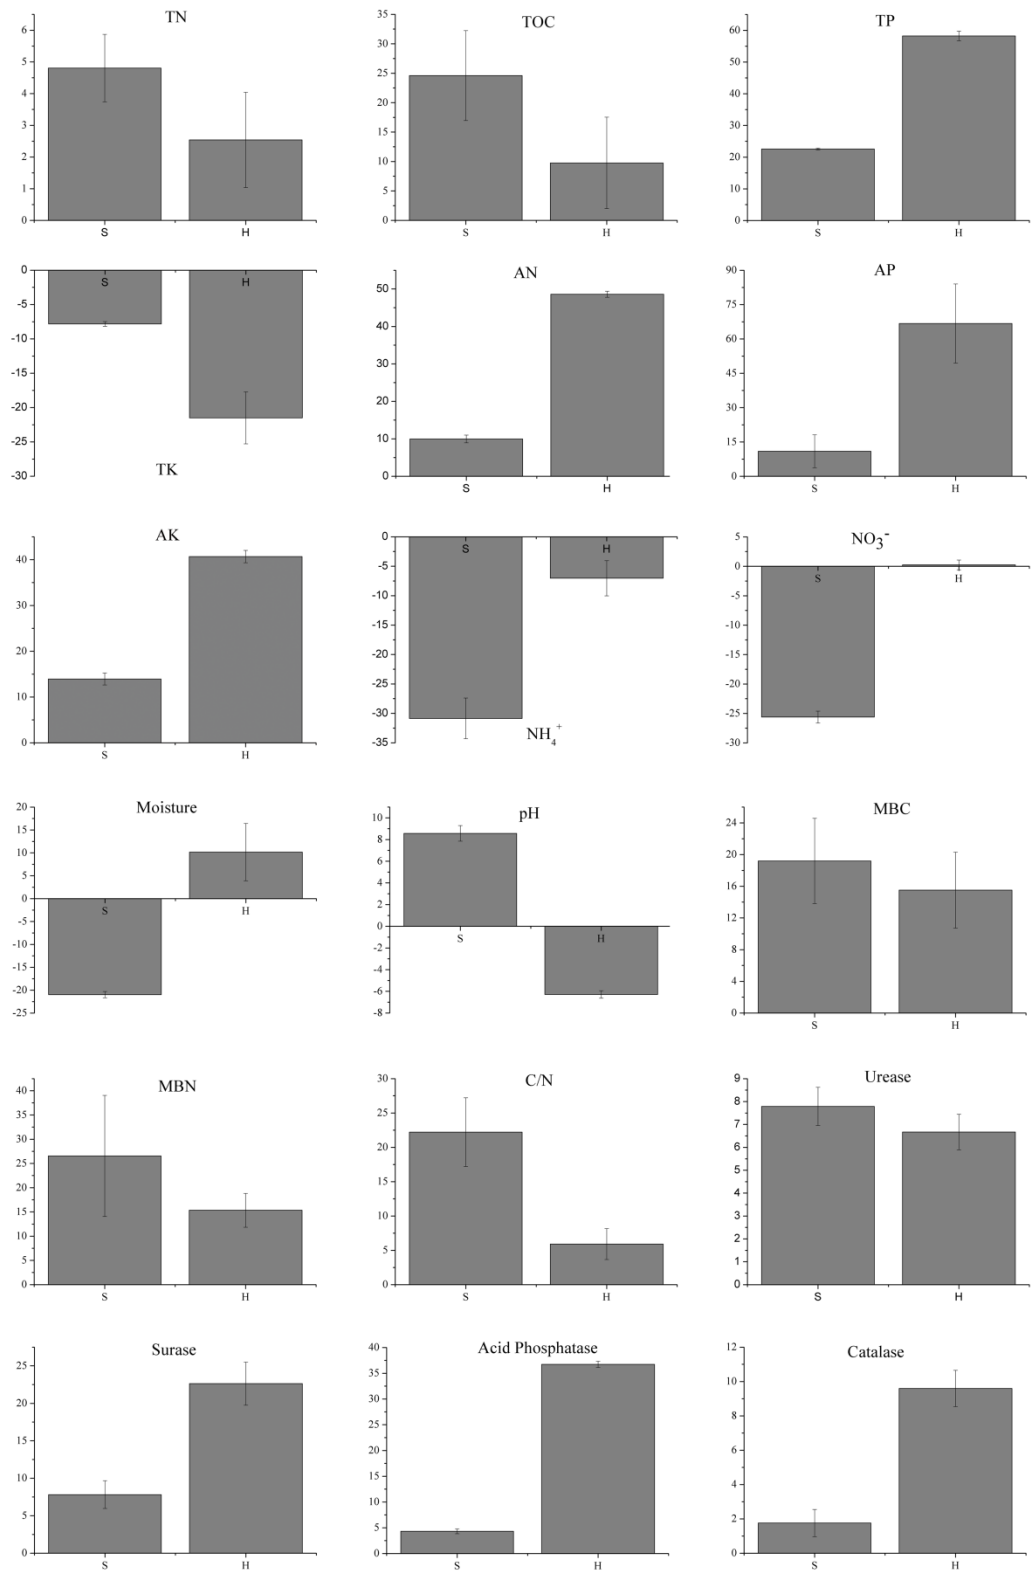

Fig.S1. The effect of *D. angustifolia* encroaching on soil nutrients are shown. Data are pooled over vegetation types and were generated by looking at the percentage loss or gain of a particular attribute *D. angustifolia* encroaching relative to the native control values. Bars are standard errors.

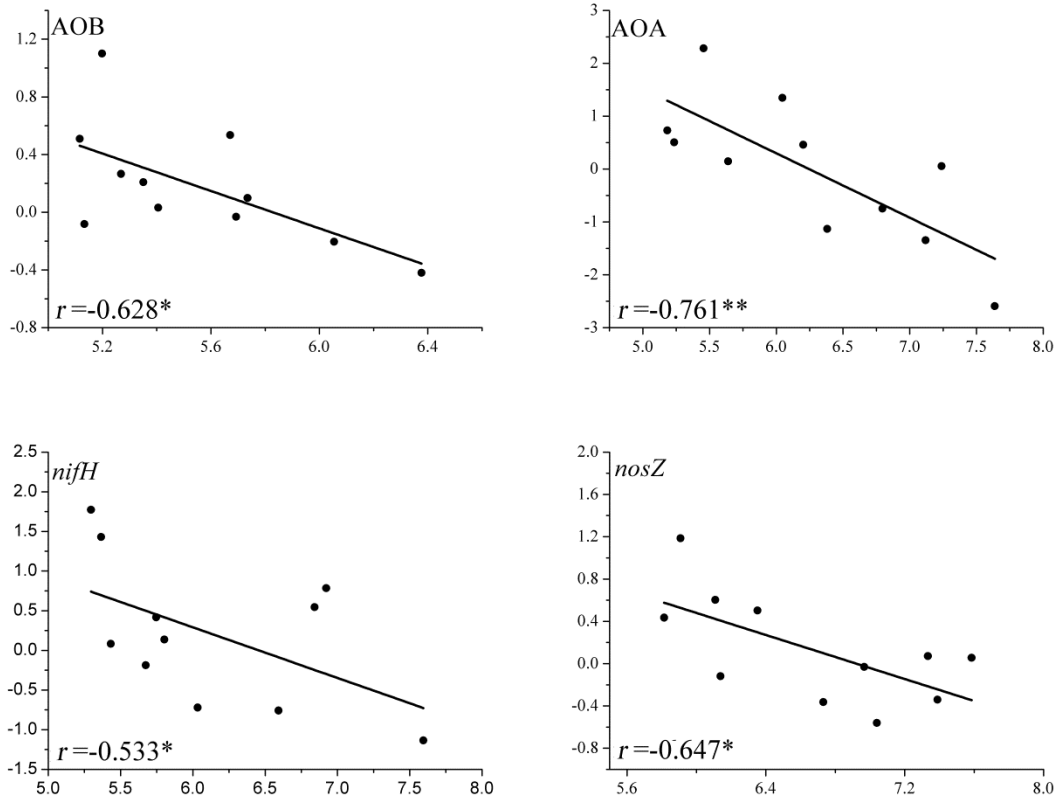

Fig.S2. Impact of invasive species on N-transforming function genes in native plots (*N*). Impact is calculated as the difference between the value of the parameter in encroaching plots (*E*) minus the value of the parameter in native plots (*N*). A positive value of *E-N* indicates an increased concentration of that element in the invaded soil Pearson correlation coefficient (*r*) between *N* and *E-N*. Significance levels(\* $P < 0.05$ , \*\* $P < 0.01$ ).

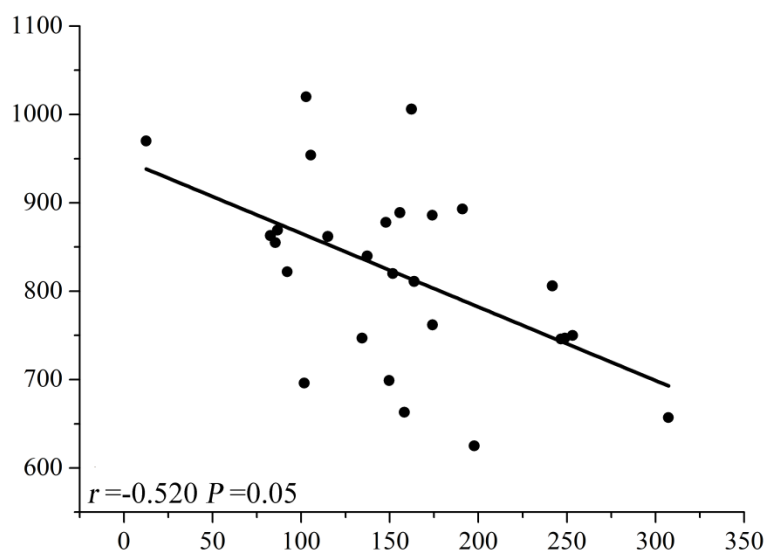

Fig.S3. Pearson correlation coefficient (*r*) between OTU richness and TOC.
